# Supplementary material
Source: MDPI journal article supplement (https://www.mdpi.com/2254-9625/12/10/108)
Supplement: s1 [file s1]

### S1. Music intervention—Melodic scales in detail

**Miyan ki Todi, raga A of this study**, is a Hindustani classical raga that gave its name to the *Todi thaat*, one of the ten modes of Hindustani classical music, also known as *Darbari Todi*, and sometimes *Shuddha Todi*; it is amongst the more popular morning *ragas* of Hindustani music. The scale of *Miyan ki Todi* is *Arohana*: S r g m d N S' or 'd 'N S r g m d N S' or S r g m d P, m d N S' or S r g m P, m d N S' and *Avarohana*: S' N d P m g r S or S' N d P m d m g r g r S. *Vadi* and *Samavadi* are *Komal Dha* and *Komal Ga*. *Re*, *ga*, and *dha* are intoned slightly low, and *tivra ma* is very sharp. Bhatkhande pronounces *Komal Dha* as *Vadi* (primarily dominant), but some musicians accord this status to *Komal Ga*. According to him, *Komal Ga* and *Komal Re* are candidates for the status of *samvadi* (secondary dominant). *Todi* is a *raga* of the late morning. The prescribed time for the *raga* is the first three-hour slot after sunrise. The equivalent *raga* in Carnatic music is *Shubhapantuvarali*. *Miyan ki Todi* predominantly is mostly pervaded by a pensive, mournful mood, which is then relieved in the *drut* (faster tempo) part by a festive piece, possibly to alleviate the heavy pathos in the earlier stages of rendering, though not always. The composition is such as to afford an artist of high caliber to mold it in either the inherent pensive mood or to entirely present a festive mood. Despite this, the *raga* has attained a decent presence in the classicist, as well as romanticist, genres of Hindustani music. The common phrases used in this scale are: N N S r g / r g r / r g M^ P or r g M^ g P / g M^ d P / M^ g M^ d / N d P / d d N S' [or] M^ d N S' / N S' r' g' r' / d N S' r' g' / r' g' r' S' / N r' N d P / M^ P d M^ g [or] N d M^ g / r g r S [1]. Popular songs based on this *raga* are: *Bhini bhini bhor* (Asha Bhosle's *Album Dil Padosi Hai*), *ari mai to prem diwani mera dard na jane koi* (A meerabai bhajan from the movie *Meera*), *Watan pe jo fida hoga* (*Phool bane angaare* movie) [2].

**Raga Malkauns** belongs to *Kalyan thaat* and is a majestic and somewhat introverted pentatonic *raga*. *Ma* is the pivotal tone of this *raga* and the tone in which the first string of the *tanpura* is usually tuned. *Ga*, *Dha*, and *Ni* may slightly oscillate. *Malkauns* should be performed in a slow and dignified manner, and to bring out its ethos the notes should be linked by glides, in particular N / D, D / M, and M / G [3]. Time: Late night, 12 - 3. *Aarohan* (ascending scale): S G M D N M D S'; *Avarohan* (descending scale): S\* N D M G M G S, D S; \* indicates a higher (third) octave. The *Rishabh* and the *pancham* are skipped in the scale. It is an *audhav–audhav* (five notes in ascent and descent of the scale) *vakra* (*nishad* is rarely employed in *avaroh*). The *vaadi samavaadi swaras* for this *raga* are d and g. The *vishranti sthaan* for this scale are G; D; S'; - D; G. Example of *sanchar* (move/phrases/flow) through this *raga*, S; G M D G M G; M G; G S; ,D ,D S; ,N ,M ,D S; S G M D; G M G; M D S'; N M D; G M M G; S; ,D ,D S. It is this preponderance of the *tivra madhyam* that requires intense training to perform this *raga*. Time for best effect is between 12 am and 3 am: 3<sup>rd</sup> *prahar* of the night (*ragas* are divided into *prahaars* whereby each *raga* has a specific period of the day when it is performed). The popular Hindi film songs based on *raga Malkauns* include *Aaye Sur Ke Panchhi Aaye* (*Sur Sangam* movie), *Adha Hai Chandrama Raat Adhi* and *Tu Chhupi Hai Kahan* (*Navrang*), *Man Tarapat Hari Darshan Ko* (*Baiju Bawra*) [3]. **Malkauns was Raga B in this study.**

**Raga Puriya** is a major hexatonic *raga* (*Shadhav–Shadhav*) of Hindustani classical music, belonging to the *marwa thaat*. Best performed just after sunset (2<sup>nd</sup> *prahar* of the night). What is common among all types of *Puriya raag* are *komal* (flat) *Re*, *shuddha* (natural) *Ga*, *tivra* (sharp) *Ma*, and *shuddha* (natural) *Ni*. *Aarohan*: N r G M D N r S and *avarohan*: S N D M G r S N or r N D M Gg, M G r S. *Pancham Varjya*. *Rishabh Komal*, *Madhyam Teevra*. Rest all *Shuddha Swaras*. *Mandra Saptak Nishad* is the *Nyas swar* in *Puriya*. Illustrative combinations are: N r G; G r ,N ,D ,N; ,N ,M ,D S; G M D N; N M G; G M D G M G; r S; G M D N D S'; N r' N M G; G M D G M G r S [4]. In this *raga*, N–M and D–G *sangati* is observed. *Nishad* is often skipped in *Aaroh* like G M D N D S'. *Raag Puriya* is often referred to as king of the night *ragas*. The *rasa* / emotions related to this *raga* are *Shanti* (equanimity/peace) and *Gambhir* (seriousness) [5]. **Puriya was Raga C in this study.** Pure *Puriya* has not been very commonly used for film music.

## S2. Music Exposure and Training:

Of the participants who were trained, 41 of them had received training for more than a year. Concerning musical training, all groups were comparable, with statistically no significant differences between them.

**Table S1: Music preference questionnaire descriptive statistics**

| Variables                            | Group A   | Group B   | Group C   | Group D   | p-Value |
|--------------------------------------|-----------|-----------|-----------|-----------|---------|
|                                      | N=37 (%)  | N=36 (%)  | N=36 (%)  | N=35 (%)  |         |
| <b>Training in Music</b>             |           |           |           |           |         |
| <b>Yes</b>                           | 17 (45.9) | 14 (38.9) | 11 (30.6) | 12 (34.3) | 0.562   |
| <b>No</b>                            | 20 (54.1) | 22 (61.1) | 25 (69.4) | 23 (65.7) |         |
| <b>The trained genre of music</b>    |           |           |           |           |         |
| <b>Indian</b>                        | 14 (82.4) | 11 (78.6) | 9 (81.8)  | 10 (83.3) | 0.898   |
| <b>Western</b>                       | 2 (11.8)  | 2 (14.3)  | 1 (9.1)   | 1 (8.3)   |         |
| <b>Both</b>                          | 1 (5.9)   | 1 (7.1)   | 1 (9.1)   | 1 (8.3)   |         |
| <b>Duration of training in music</b> |           |           |           |           |         |
| <b>≤1 year</b>                       | 2 (11.8)  | 4 (28.6)  | 3 (27.3)  | 2 (16.7)  | 0.619   |
| <b>&gt; 1 year</b>                   | 15 (88.2) | 10 (71.4) | 8 (72.7)  | 10 (83.3) |         |

Note:

- N is the number of participants in each group.
- All the values of the two groups are in absolute values and in parenthesis are in percentages.
- p-value < 0.05 was considered significant
- p calculated using Chi-square / Fisher exact test.

## S3. Salivary Stress Markers

**Table S2: Post hoc analysis of sAA and sCort**

| Group                                                   |     |      |          | Mean      | Std.   | <i>p</i> -          | 95% Confidence Interval for |             |
|---------------------------------------------------------|-----|------|----------|-----------|--------|---------------------|-----------------------------|-------------|
|                                                         |     |      |          | Differenc | Error  | Value. <sup>b</sup> | Difference <sup>b</sup>     |             |
|                                                         |     |      |          | e (I-J)   |        |                     | Lower Bound                 | Upper Bound |
| Salivary<br>Cortisol<br>in U/mL                         | D   | Pre  | Dur      | .079*     | .024   | .007                | .019                        | .139        |
|                                                         |     |      | Post     | -.021     | .019   | .807                | -.069                       | .027        |
|                                                         |     | Dur  | Post     | -.100*    | .021   | .000                | -.155                       | -.046       |
| Salivary<br>Alpha-<br>Amylase<br>in U/mL                | A   | Pre  | Dur      | 66.154*   | 6.542  | .000                | 49.456                      | 82.852      |
|                                                         |     | Dur  | Post     | -80.228*  | 10.720 | .000                | -107.589                    | -52.866     |
|                                                         | B   | Pre  | Dur      | 73.108*   | 7.078  | .000                | 54.995                      | 91.220      |
|                                                         |     |      | Post     | -26.663*  | 8.962  | .019                | -49.597                     | -3.729      |
|                                                         |     | Dur  | Post     | -99.771*  | 10.417 | .000                | -126.427                    | -73.115     |
|                                                         | C   | Pre  | Dur      | 63.538*   | 6.149  | .000                | 47.541                      | 79.534      |
|                                                         |     | Dur  | Post     | -74.661*  | 7.942  | .000                | -95.322                     | -54.001     |
|                                                         | D   | Pre  | Dur      | 60.913*   | 5.104  | .000                | 47.851                      | 73.974      |
|                                                         | Dur | Post | -72.714* | 7.504     | .000   | -91.917             | -53.510                     |             |
| Based on estimated marginal means                       |     |      |          |           |        |                     |                             |             |
| *. The mean difference is significant at the .05 level. |     |      |          |           |        |                     |                             |             |
| b. Adjustment for multiple comparisons: Bonferroni.     |     |      |          |           |        |                     |                             |             |

#### S4. Blood pressure and Heart Rate

On comparison of pre-intervention levels of all SBP, DBP, and HR across the groups, it was observed that they were comparable (SBP,  $P = 0.708$ ; DBP,  $P = 0.371$ ; and HR,  $P = 0.741$ ). Between the groups, we did not find any statistically significant difference (SBP: group A,  $P = 0.794$ ; B,  $P = 0.416$ ; C,  $P = 0.234$ ; D,  $P = 0.215$ ; DBP: group A,  $P = 0.208$ ; B,  $P = 0.484$ ; C,  $P = 0.622$ ; D,  $P = 0.429$ ). On RM-ANOVA analysis, no significant differences were observed in SBP in any of the groups (See Figure 4a,4b in main text). However, there was a continuous trend of reduction in SBP in groups C and D. In group B, SBP was reduced only during the intervention and returned to pre-intervention levels after the intervention. In group A, SBP increased slightly with music. Similar to SBP, the DBP change was statistically not significant in any of the groups (See Figure 4c,4d in the main text). A trend towards sustained rise was observed in groups B and C with and after the intervention, while in group A, DBP reduced with music and returned to baseline after the intervention. In the control group, DBP increased slightly with the intervention, followed by a mild reduction after the intervention. In groups, B, C, and D, a sustained drop in HR was observed throughout the 30-minute duration, with group C having a higher drop in HR during the intervention (See Figure 4e,4f in main text).

**Table S3a: Comparison of systolic blood pressure (in mm Hg), diastolic blood pressure (in mm of Hg) and Heart rate between four intervention groups (pre, during and post music intervention)**

|                                        |          |      |        |      | Quartiles |       |        |       |
|----------------------------------------|----------|------|--------|------|-----------|-------|--------|-------|
|                                        | Group    | Time | Mean   | SD   | 25        | 50    | 75     | P     |
| Systolic Blood Pressure (in mm Hg)     | A (N=37) | Pre  | 107.33 | 9.7  | 104       | 114   | 123    | 0.818 |
|                                        |          | Dur  | 107.81 | 9.2  | 106       | 113.5 | 120.8  |       |
|                                        |          | Post | 107.64 | 10.5 | 105       | 115   | 124.4  |       |
|                                        | B (N=36) | Pre  | 107.22 | 9.0  | 100       | 107.5 | 112.75 | 0.416 |
|                                        |          | Dur  | 106.53 | 10.4 | 99        | 107   | 113.5  |       |
|                                        |          | Post | 107.44 | 10.0 | 100.25    | 106.5 | 111.75 |       |
|                                        | C (N=36) | Pre  | 108.47 | 10.5 | 100.25    | 106   | 114    | 0.236 |
|                                        |          | Dur  | 106.94 | 10.4 | 100.25    | 105.5 | 112.5  |       |
|                                        |          | Post | 106.28 | 12.2 | 100.25    | 107   | 115    |       |
|                                        | D (N=35) | Pre  | 105.71 | 10.0 | 99        | 107   | 113    | 0.22  |
|                                        |          | Dur  | 105.35 | 10.3 | 98        | 108   | 113    |       |
|                                        |          | Post | 103.76 | 11.4 | 95        | 104   | 113    |       |
| Diastolic Blood Pressure (in mm of Hg) | A (N=37) | Pre  | 73.75  | 7.1  | 71        | 79.5  | 85     | 0.163 |
|                                        |          | Dur  | 72.03  | 5.2  | 71        | 75.5  | 80     |       |
|                                        |          | Post | 72.47  | 7.3  | 72        | 76.5  | 82.8   |       |
|                                        | B (N=36) | Pre  | 71.03  | 6.7  | 65.5      | 73.5  | 76     | 0.484 |
|                                        |          | Dur  | 71.44  | 7.3  | 69        | 72    | 76     |       |
|                                        |          | Post | 72.03  | 7.3  | 67.25     | 72    | 78.75  |       |
|                                        | C (N=36) | Pre  | 71.08  | 6.7  | 65        | 71    | 75.75  | 0.622 |
|                                        |          | Dur  | 71.5   | 8.2  | 67        | 70.5  | 75.75  |       |
|                                        |          | Post | 72.11  | 8.5  | 66        | 74    | 77.75  |       |
|                                        | D (N=35) | Pre  | 71.79  | 6.1  | 68        | 73    | 77     | 0.403 |
|                                        |          | Dur  | 73.03  | 6.8  | 68        | 74    | 77     |       |
|                                        |          | Post | 72.41  | 7.8  | 65        | 73    | 79     |       |
| Heart Rate (in bpm)                    | A (N=37) | Pre  | 75.75  | 11.5 | 76        | 83    | 90.2   | 0.031 |
|                                        |          | Dur  | 76.31  | 11.7 | 77        | 86    | 90.4   |       |

|  |                 |      |       |      |       |      |       |       |
|--|-----------------|------|-------|------|-------|------|-------|-------|
|  |                 | Post | 73.28 | 12.6 | 75    | 80.5 | 88    |       |
|  | <b>B (N=36)</b> | Pre  | 73.61 | 13.5 | 63.25 | 70.5 | 80.25 | 0.478 |
|  |                 | Dur  | 73.28 | 15.1 | 60    | 71   | 83    |       |
|  |                 | Post | 72.11 | 12.9 | 60.25 | 71   | 77.75 |       |
|  | <b>C (N=36)</b> | Pre  | 73.67 | 14.7 | 66.25 | 71.5 | 80.75 | 0.279 |
|  |                 | Dur  | 71.17 | 12.1 | 62.25 | 71   | 79.75 |       |
|  |                 | Post | 70.92 | 12.4 | 63    | 69.5 | 80.75 |       |
|  | <b>D (N=35)</b> | Pre  | 72.59 | 12.9 | 65    | 71   | 79    | 0.74  |
|  |                 | Dur  | 72.18 | 8.8  | 68    | 73   | 76    |       |
|  |                 | Post | 71.62 | 9.6  | 65    | 72   | 76    |       |

**Note:**

- N is the number of participants in each group.
- All the values are in mean and standard deviation (SD)—univariate ANOVA.
- $p$ -value < 0.05 was considered significant— Levene's test of equality
- $p$  calculated using RM-ANOVA.

**Table S3b: Pairwise comparison of HR in group A based on time (Pre =1 , Dur = 2, Post = 3)**

| RANDOM GROUP                                                                                                        | (I) TIME | (J) TIME | Mean Difference (I-J) | Std. Error | p-value <sup>a</sup> | 95% Confidence Interval for Difference <sup>a</sup> |             |
|---------------------------------------------------------------------------------------------------------------------|----------|----------|-----------------------|------------|----------------------|-----------------------------------------------------|-------------|
|                                                                                                                     |          |          |                       |            |                      | Lower Bound                                         | Upper Bound |
| A                                                                                                                   | 1        | 2        | -.676                 | 1.084      | 1.000                | -3.397                                              | 2.045       |
|                                                                                                                     |          | 3        | 2.676                 | 1.403      | .193                 | -.846                                               | 6.197       |
|                                                                                                                     | 2        | 1        | .676                  | 1.084      | 1.000                | -2.045                                              | 3.397       |
|                                                                                                                     |          | 3        | 3.351                 | 1.424      | .073*                | -.225                                               | 6.928       |
|                                                                                                                     | 3        | 1        | -2.676                | 1.403      | .193                 | -6.197                                              | .846        |
|                                                                                                                     |          | 2        | -3.351                | 1.424      | .073                 | -6.928                                              | .225        |
| Based on estimated marginal means; 1 is pre-intervention, 2 is during the intervention, and 3 is post-intervention. |          |          |                       |            |                      |                                                     |             |
| a. Adjustment for multiple comparisons: Bonferroni.                                                                 |          |          |                       |            |                      |                                                     |             |

##### S5. Heart Rate Variability

**Table S4: Comparison of time-domain parameters of HRV between the four groups**

|              |   | Mean | SD     | Min   | Max    | Percentiles |        |        | F(df <sub>time</sub> , df <sub>error</sub> ) = F value | $p$     |
|--------------|---|------|--------|-------|--------|-------------|--------|--------|--------------------------------------------------------|---------|
|              |   |      |        |       |        | 25          | 50     | 75     |                                                        |         |
| Mean NN (ms) | A | Pre  | 832.57 | 118.5 | 620.38 | 1086.49     | 743.07 | 821.55 | (2,70)=8.854                                           | <0.0001 |
|              |   | Dur  | 844.19 | 127.7 | 632.18 | 1121.28     | 758.83 | 830.08 |                                                        |         |
|              |   | Post | 855.23 | 126.7 | 619.8  | 1125.15     | 776.01 | 839.84 |                                                        |         |
|              | B | Pre  | 844.49 | 143.8 | 557.96 | 1151.72     | 746.13 | 860.74 | (1.585,53.874)=16.908                                  | <0.0001 |
|              |   | Dur  | 869    | 149.3 | 573.24 | 1207.65     | 760.84 | 887.42 |                                                        |         |
|              |   | Post | 877.22 | 147.6 | 607.72 | 1202.98     | 768.23 | 877.55 |                                                        |         |
|              | C | Pre  | 861.24 | 129.7 | 598.65 | 1179.46     | 782.3  | 837.65 | (2,70)=3.642                                           | 0.031   |
|              |   | Dur  | 869.06 | 127.2 | 595.91 | 1196.59     | 776.75 | 859.66 |                                                        |         |
|              |   | Post | 884.7  | 133.1 | 603.84 | 1233.71     | 783.54 | 865.35 |                                                        |         |
|              | D | Pre  | 843.94 | 131.3 | 626.76 | 1119.1      | 751.33 | 811.11 | (1.247,41.143)=5.844                                   | 0.015   |
|              |   | Dur  | 862.68 | 131.2 | 628.03 | 1154.47     | 790.99 | 828.34 |                                                        |         |

|   |         |   |      |        |       |        |         |        |        |        |                       |                   |
|---|---------|---|------|--------|-------|--------|---------|--------|--------|--------|-----------------------|-------------------|
| P | Mean HR |   | Post | 863.42 | 128.4 | 587.25 | 1162.77 | 790.9  | 849.58 | 934.38 |                       |                   |
|   |         | A | Pre  | 73.44  | 10.1  | 55.22  | 96.71   | 67.01  | 73.03  | 80.75  | (2,70)=5.256          | <b>0.008</b>      |
|   |         |   | Dur  | 72.63  | 10.7  | 53.51  | 94.91   | 66.29  | 72.28  | 79.07  |                       |                   |
|   |         |   | Post | 71.65  | 10.5  | 53.33  | 96.81   | 65.06  | 71.45  | 77.33  |                       |                   |
|   |         | B | Pre  | 73.24  | 13.5  | 52.1   | 107.54  | 63.46  | 69.72  | 80.42  | (1.625,55.249)=14.987 | <b>&lt;0.0001</b> |
|   |         |   | Dur  | 71.2   | 13.2  | 49.68  | 104.67  | 59.85  | 67.61  | 78.87  |                       |                   |
|   |         |   | Post | 70.41  | 12.5  | 49.88  | 98.73   | 59.98  | 68.37  | 78.1   |                       |                   |
|   |         | C | Pre  | 71.2   | 10.7  | 50.87  | 100.23  | 62.94  | 71.63  | 76.7   | (2,70)=3.907          | <b>0.025</b>      |
|   |         |   | Dur  | 70.44  | 10.1  | 50.14  | 100.69  | 64.13  | 69.8   | 77.25  |                       |                   |
|   |         |   | Post | 69.28  | 10.2  | 48.63  | 99.36   | 63.05  | 69.34  | 76.58  |                       |                   |
|   |         | D | Pre  | 72.78  | 11.3  | 53.61  | 95.73   | 63.21  | 74.16  | 79.97  | (1.177,38.837)=5.109  | <b>0.024</b>      |
|   |         |   | Dur  | 71.08  | 10.5  | 51.97  | 95.54   | 63.39  | 72.58  | 76.61  |                       |                   |
|   |         |   | Post | 70.99  | 10.6  | 51.6   | 102.17  | 65.4   | 70.68  | 75.88  |                       |                   |
|   | SDNN    | A | Pre  | 66.07  | 30.5  | 19.76  | 152.49  | 45.92  | 61.3   | 78.39  | (2,70)=11.208         | <b>&lt;0.001</b>  |
|   |         |   | Dur  | 64.38  | 32.1  | 21.94  | 167.05  | 44.35  | 57.71  | 69.56  |                       |                   |
|   |         |   | Post | 74.41  | 36.1  | 19.89  | 165.59  | 53.12  | 64.9   | 94.15  |                       |                   |
|   |         | B | Pre  | 63.9   | 27.9  | 20.49  | 125.52  | 40.1   | 63.3   | 82.46  | (2,68)=4.066          | <b>0.022</b>      |
|   |         |   | Dur  | 67.11  | 31.9  | 16.26  | 148.53  | 39.36  | 66.13  | 91.04  |                       |                   |
|   |         |   | Post | 71.2   | 31.9  | 19.46  | 147.24  | 40.29  | 72.8   | 94.73  |                       |                   |
|   |         | C | Pre  | 71.83  | 34.7  | 28.58  | 173.05  | 48.66  | 64.57  | 87.48  | (2,70)=9.068          | <b>&lt;0.001</b>  |
|   |         |   | Dur  | 66.59  | 29.9  | 25.19  | 136.92  | 42.75  | 63.22  | 79.99  |                       |                   |
|   |         |   | Post | 78.82  | 38.5  | 30.6   | 182.07  | 53     | 68.44  | 96.62  |                       |                   |
|   |         | D | Pre  | 62.12  | 24.4  | 20.56  | 129.43  | 41.66  | 58.32  | 80.07  | (2,66)=8.580          | <b>&lt;0.001</b>  |
|   |         |   | Dur  | 64.97  | 24.1  | 25.33  | 128.67  | 43.92  | 65.06  | 83.2   |                       |                   |
|   |         |   | Post | 71.63  | 27.2  | 22.26  | 132.79  | 49.61  | 67.44  | 90.62  |                       |                   |
|   | RMSSD   | A | Pre  | 65.2   | 45.8  | 14.76  | 230.66  | 37.74  | 51.57  | 75.6   | (2,70)=4.619          | <b>0.013</b>      |
|   |         |   | Dur  | 63.67  | 50.3  | 10     | 260.82  | 32.57  | 50.06  | 77.09  |                       |                   |
|   |         |   | Post | 73.15  | 55.2  | 13.58  | 258.84  | 34.08  | 56.69  | 84.53  |                       |                   |
|   |         | B | Pre  | 61.71  | 41.7  | 8.91   | 167.28  | 28.73  | 58.43  | 81.11  | (2,68)=3.207          | 0.05              |
|   |         |   | Dur  | 66.74  | 48.3  | 7.47   | 191.13  | 29.97  | 64.91  | 80.94  |                       |                   |
|   |         |   | Post | 67.27  | 45.3  | 10.57  | 195.64  | 29.56  | 64.39  | 87.41  |                       |                   |
|   |         | C | Pre  | 70.39  | 48.3  | 13.14  | 185.39  | 34.76  | 53.4   | 97.38  | (2,70)=3.34           | <b>0.041</b>      |
|   |         |   | Dur  | 67.64  | 47.7  | 14.79  | 216.71  | 34.63  | 54.36  | 83.76  |                       |                   |
|   |         |   | Post | 77.34  | 55.7  | 17.36  | 277.13  | 38.03  | 55.32  | 97.57  |                       |                   |
|   |         | D | Pre  | 58.99  | 32.0  | 11.4   | 127.27  | 35.37  | 48.15  | 83.45  | (2,66)=6.31           | <b>0.003</b>      |
|   |         |   | Dur  | 62.6   | 31.5  | 12.18  | 131.82  | 37.51  | 59.58  | 83.91  |                       |                   |
|   |         |   | Post | 66.96  | 33.7  | 11.4   | 147.01  | 40.22  | 62.03  | 95.94  |                       |                   |
|   | NN50    | A | Pre  | 226.19 | 132.6 | 1      | 486     | 110.75 | 253.5  | 310.75 | (2,70)=1.363          | 0.263             |
|   |         |   | Dur  | 213    | 140.1 | 0      | 460     | 71     | 213    | 302.5  |                       |                   |
|   |         |   | Post | 231.56 | 144.2 | 1      | 484     | 85.5   | 231.5  | 347    |                       |                   |
|   |         | B | Pre  | 223.31 | 185.6 | 0      | 566     | 52     | 223.5  | 391.5  | (1.435,48.794)=0.248  | 0.707             |
|   |         |   | Dur  | 215    | 162.9 | 0      | 528     | 68.5   | 213.5  | 330    |                       |                   |
|   |         |   | Post | 219.94 | 160.1 | 1      | 530     | 74     | 215    | 312    |                       |                   |
|   |         | C | Pre  | 258.42 | 190.6 | 2      | 664     | 92.25  | 198.5  | 425.5  | (1.66,58.243)=0.034   | 0.946             |
|   |         |   | Dur  | 257.28 | 171.7 | 3      | 536     | 94     | 270.5  | 436.25 |                       |                   |
|   |         |   | Post | 254.64 | 142.4 | 12     | 544     | 125.5  | 243    | 376.25 |                       |                   |
|   |         | D | Pre  | 236.47 | 183.1 | 1      | 890     | 98     | 201.5  | 356.5  | (1.178,58.352)=0.204  | 0.789             |
|   |         |   | Dur  | 246.94 | 162.0 | 2      | 746     | 118.5  | 255    | 341    |                       |                   |
|   |         |   | Post | 247.15 | 137.2 | 0      | 496     | 135.75 | 280    | 344    |                       |                   |
|   | P       | A | Pre  | 30.45  | 19.9  | 0.12   | 78.41   | 13.46  | 30.6   | 42.34  | (2,70)=1.588          | 0.212             |

|   |      |       |      |      |       |       |       |       |                      |       |
|---|------|-------|------|------|-------|-------|-------|-------|----------------------|-------|
|   | Dur  | 30.86 | 22.4 | 0    | 82.64 | 9.31  | 31.47 | 44.11 |                      |       |
|   | Post | 32.97 | 22.5 | 0.1  | 80.66 | 10.86 | 30.63 | 41.06 |                      |       |
| B | Pre  | 32.19 | 26.2 | 0    | 83.07 | 6.84  | 34.25 | 52.07 | (1.393,47.375)=2.147 | 0.142 |
|   | Dur  | 33.34 | 26.5 | 0    | 80.4  | 7.33  | 35.1  | 52.76 |                      |       |
|   | Post | 35.04 | 26.1 | 0.1  | 82.66 | 8.44  | 37.5  | 55.97 |                      |       |
| C | Pre  | 34.99 | 24.7 | 0.21 | 75.43 | 10.87 | 33.18 | 54.16 | (1.756,61.469)=3.128 | 0.06  |
|   | Dur  | 35.13 | 24.9 | 0.31 | 82.59 | 12.33 | 33.62 | 52.07 |                      |       |
|   | Post | 37.92 | 23.4 | 1.15 | 79.07 | 16.76 | 37.53 | 56.02 |                      |       |
| D | Pre  | 31.61 | 22.5 | 0.1  | 71.77 | 12.06 | 26.27 | 52.85 | (1.235,40.765)=3.088 | 0.078 |
|   | Dur  | 33.54 | 21.9 | 0.19 | 72.01 | 14.58 | 34.54 | 52.39 |                      |       |
|   | Post | 35.34 | 21.1 | 0    | 71.62 | 16.78 | 35.3  | 52.54 |                      |       |

**Table S5: Comparison of frequency-domain parameters of HRV between the four groups**

|           |   |      | Mean    | SD     | Min    | Max     | Percentiles |         |         | F(df <sub>time</sub> , df <sub>error</sub> ) = F | p     |
|-----------|---|------|---------|--------|--------|---------|-------------|---------|---------|--------------------------------------------------|-------|
|           |   |      |         |        |        |         | 25          | 50      | 75      | value                                            |       |
| TP (ms2)  | A | Pre  | 5095.95 | 5419.2 | 420.16 | 22146.9 | 2011.06     | 3380.3  | 5599.52 | (2,70)=7.291                                     | 0.001 |
|           |   | Dur  | 4913.12 | 5759.5 | 427.13 | 27246.6 | 1433.55     | 3048.35 | 4568.31 |                                                  |       |
|           |   | Post | 6510.2  | 6838.6 | 335.16 | 26477.4 | 2637.89     | 3680.8  | 8644.46 |                                                  |       |
|           | B | Pre  | 4495.09 | 3770.9 | 338.84 | 14823.3 | 1449.76     | 3737.17 | 6117.14 | (1.748,61.167)=4.421                             | 0.020 |
|           |   | Dur  | 5048.44 | 4646.1 | 258.78 | 19947.9 | 1326.04     | 3668.72 | 7551.1  |                                                  |       |
|           |   | Post | 5875    | 5286.2 | 303.78 | 22966.3 | 1488.67     | 4798.3  | 7988.89 |                                                  |       |
|           | C | Pre  | 6149.24 | 6509.2 | 539.63 | 30386.7 | 2190.71     | 4216.17 | 7983.97 | (2,70)=4.702                                     | 0.012 |
|           |   | Dur  | 5291.66 | 5276.2 | 546.98 | 20559.6 | 1510.47     | 3755.9  | 6523.42 |                                                  |       |
|           |   | Post | 7502.7  | 8286.2 | 815.09 | 33352.4 | 2270.37     | 4306.67 | 9433.66 |                                                  |       |
|           | D | Pre  | 4177.44 | 3342.3 | 395.44 | 14789.2 | 1641.55     | 3070.9  | 6440.53 | (2,66)=3.8                                       | 0.027 |
|           |   | Dur  | 4567.27 | 3465.4 | 645.93 | 15867.7 | 1993.28     | 3449.98 | 6487.22 |                                                  |       |
|           |   | Post | 5255.51 | 3774.2 | 432.59 | 17376   | 2409.59     | 4113.7  | 7291.77 |                                                  |       |
| VLF (ms2) | A | Pre  | 1060.76 | 641.9  | 194.13 | 2695.84 | 644.46      | 902.33  | 1479.56 | (1.595,55.824)=3.127                             | 0.063 |
|           |   | Dur  | 1117.27 | 1101.3 | 157.76 | 5277.33 | 448.31      | 776.43  | 1164.49 |                                                  |       |
|           |   | Post | 1537.73 | 1568.3 | 98.11  | 8131.27 | 599.09      | 1127.61 | 1575.58 |                                                  |       |
|           | B | Pre  | 1113.18 | 935.5  | 146.12 | 3957.64 | 402.58      | 746.13  | 1552.25 | (2,70)=4.595                                     | 0.013 |
|           |   | Dur  | 1300.72 | 1047.0 | 119.82 | 3847.22 | 547.56      | 866.94  | 1876.43 |                                                  |       |
|           |   | Post | 1744.05 | 1689.5 | 69.21  | 7374.79 | 574.94      | 1321.68 | 1798.24 |                                                  |       |
|           | C | Pre  | 1878.68 | 2249.1 | 196.83 | 11816.5 | 641.15      | 1129.85 | 2063.46 | (2,70)=5.313                                     | 0.007 |
|           |   | Dur  | 1418.72 | 1908.4 | 93.97  | 11297.7 | 464.35      | 886.17  | 1785.35 |                                                  |       |
|           |   | Post | 2071.34 | 2887.3 | 142.9  | 15538   | 625.55      | 1335.72 | 2295.61 |                                                  |       |
|           | D | Pre  | 1151.48 | 1038.4 | 77.69  | 5336.71 | 489.1       | 892.08  | 1402.54 | (2,66)=0.806                                     | 0.451 |
|           |   | Dur  | 1336.48 | 1264.7 | 320.42 | 7449.73 | 633.41      | 1068.22 | 1632.61 |                                                  |       |
|           |   | Post | 1404.73 | 1012.3 | 100.14 | 4537.77 | 736.91      | 1225.15 | 1683.94 |                                                  |       |
| LF (ms2)  | A | Pre  | 1364.42 | 1474.0 | 103.11 | 7839.03 | 388.75      | 924.06  | 1784.1  | (1.330,46.538)=4.71                              | 0.026 |
|           |   | Dur  | 1220.28 | 1409.4 | 142.11 | 7303.4  | 321.76      | 851.67  | 1464.24 |                                                  |       |
|           |   | Post | 1771.5  | 1830.6 | 134.03 | 7245.26 | 524.82      | 1140.08 | 2012.94 |                                                  |       |
|           | B | Pre  | 1131.91 | 1010.8 | 61.49  | 4601.4  | 427.35      | 857.15  | 1556.1  | (1.439,50.378)=2.502                             | 0.108 |
|           |   | Dur  | 1214.31 | 1135.3 | 81.89  | 4121.94 | 381.04      | 709.15  | 1927.15 |                                                  |       |
|           |   | Post | 1524.86 | 1883.8 | 167.12 | 10786.4 | 571.66      | 1047.09 | 1897.06 |                                                  |       |
|           | C | Pre  | 1503.04 | 1628.1 | 159.18 | 7876.05 | 585         | 907.87  | 1820.27 | (1.284,44.942)=4.559                             | 0.029 |
|           |   | Dur  | 1232.27 | 1063.5 | 111.19 | 4491.08 | 470.35      | 980.56  | 1726.92 |                                                  |       |
|           |   | Post | 1960.42 | 2150.8 | 257.78 | 11504   | 642.69      | 1050    | 2973.81 |                                                  |       |

|          |   |      |         |        |        |         |        |         |         |                      |              |
|----------|---|------|---------|--------|--------|---------|--------|---------|---------|----------------------|--------------|
| LF (nu)  | D | Pre  | 1171.37 | 1188.6 | 93.36  | 6494.83 | 420.6  | 877.64  | 1518.69 | (1.555,53.393)=1.87  | 0.172        |
|          |   | Dur  | 1295.99 | 1266.7 | 168.93 | 5964.73 | 486.54 | 881.23  | 1587.72 |                      |              |
|          |   | Post | 1539.95 | 1426.8 | 217.33 | 7140.09 | 663.82 | 1156.17 | 2002.34 |                      |              |
|          | A | Pre  | 40.44   | 15.8   | 10.04  | 79.63   | 29.14  | 41.43   | 51.12   | (2,70)=4.535         | <b>0.014</b> |
|          |   | Dur  | 39.56   | 16.3   | 10.1   | 74.73   | 29.34  | 42.78   | 50.25   |                      |              |
|          |   | Post | 43.83   | 19.3   | 6.18   | 82.62   | 25.72  | 46.46   | 58.05   |                      |              |
|          | B | Pre  | 43.25   | 21.1   | 9.16   | 85.14   | 25.55  | 39.75   | 57.9    | (2,70)=0.746         | 0.478        |
|          |   | Dur  | 42.41   | 21.7   | 9.94   | 84.62   | 25.86  | 38.38   | 58.96   |                      |              |
|          |   | Post | 44.33   | 20.7   | 13.5   | 79.48   | 25.8   | 40.67   | 62.77   |                      |              |
|          | C | Pre  | 42.29   | 17.4   | 14.6   | 83      | 29.69  | 42.93   | 52.42   | (2,70)=2.141         | 0.125        |
|          |   | Dur  | 40.66   | 18.8   | 11.87  | 87.23   | 25.97  | 37.84   | 49.43   |                      |              |
|          |   | Post | 43.48   | 17.8   | 6.55   | 81.41   | 27.44  | 45.74   | 55.97   |                      |              |
|          | D | Pre  | 41.73   | 13.9   | 20.24  | 67.72   | 30.71  | 41.35   | 52.37   | (2,66)=0.87          | 0.424        |
|          |   | Dur  | 41.4    | 15.4   | 20.31  | 79.86   | 28.86  | 39.13   | 51.02   |                      |              |
|          |   | Post | 43.48   | 15.1   | 17.8   | 70.97   | 31.55  | 41.91   | 52.16   |                      |              |
| HF (ms2) | A | Pre  | 2300.53 | 3508.0 | 102.7  | 15196.9 | 407.58 | 1223.75 | 2255.82 | (2,70)=2.106         | 0.129        |
|          |   | Dur  | 2205.29 | 3845.6 | 98.3   | 20973.8 | 411.45 | 977.11  | 1922.42 |                      |              |
|          |   | Post | 2724    | 4135.8 | 91.38  | 19746.4 | 492.49 | 1151.97 | 2155.6  |                      |              |
|          | B | Pre  | 1952.82 | 2494.1 | 33.24  | 11426.6 | 394.03 | 1232.09 | 3079.13 | (2,70)=1.677         | 0.194        |
|          |   | Dur  | 2223.82 | 3020.5 | 22.34  | 14610.3 | 323.41 | 1621.43 | 2601.11 |                      |              |
|          |   | Post | 2312.33 | 2959.0 | 47.96  | 13970   | 399.83 | 1592.69 | 2725.47 |                      |              |
|          | C | Pre  | 2069.48 | 2154.3 | 49.18  | 8027.73 | 502.94 | 1177.53 | 3043.25 | (2,70)=2.227         | 0.115        |
|          |   | Dur  | 2150.6  | 2591.3 | 97.16  | 10952.5 | 476.94 | 1084.4  | 2833.33 |                      |              |
|          |   | Post | 2645.22 | 2961.8 | 158.65 | 11548.2 | 534.86 | 1313.53 | 4035.13 |                      |              |
|          | D | Pre  | 1591.07 | 1545.0 | 75.73  | 5533.11 | 398.95 | 1067.53 | 2321.29 | (1.190,39.274)=4.203 | <b>0.041</b> |
|          |   | Dur  | 1709.74 | 1479.9 | 87.44  | 5035.98 | 567.68 | 1302.84 | 2704.98 |                      |              |
|          |   | Post | 2047.83 | 1897.6 | 97.09  | 7072.91 | 558.5  | 1513.38 | 3154.41 |                      |              |
| HF (nu)  | A | Pre  | 49.14   | 14.6   | 14.43  | 76.68   | 40.59  | 49.39   | 59.21   | (2,70)=2.402         | 0.098        |
|          |   | Dur  | 49.43   | 15.4   | 22.45  | 78.69   | 40.78  | 49.36   | 59.43   |                      |              |
|          |   | Post | 46.47   | 17.1   | 12.87  | 78.73   | 35.35  | 41.79   | 57.72   |                      |              |
|          | B | Pre  | 48.8    | 19.1   | 11.92  | 82.58   | 34.39  | 51.84   | 59.4    | (2,70)=0.401         | 0.672        |
|          |   | Dur  | 50.02   | 19.1   | 12.05  | 78.64   | 34.13  | 54.58   | 63.74   |                      |              |
|          |   | Post | 49.19   | 18.8   | 16.65  | 80.95   | 32.09  | 53.98   | 64.43   |                      |              |
|          | C | Pre  | 50.02   | 16.2   | 15.33  | 80.01   | 40.03  | 49.87   | 62.66   | (2,70)=1.759         | 0.18         |
|          |   | Dur  | 52.01   | 18.0   | 11.5   | 81.19   | 43.68  | 53.86   | 65.6    |                      |              |
|          |   | Post | 49.38   | 17.4   | 16.37  | 81.26   | 38.23  | 47.1    | 65.53   |                      |              |
|          | D | Pre  | 49.34   | 14.3   | 17.34  | 72.88   | 35.2   | 51.35   | 59.64   | (1.716,56.627)=0.775 | 0.448        |
|          |   | Dur  | 51.37   | 14.8   | 19.02  | 71.32   | 38.57  | 52.97   | 64.92   |                      |              |
|          |   | Post | 49.44   | 14.0   | 25.14  | 74.29   | 36.69  | 52.51   | 60.39   |                      |              |
| LF/HF    | A | Pre  | 1.01    | 0.8    | 0.15   | 4.16    | 0.57   | 0.83    | 1.26    | (1.457,51.004)=4.385 | <b>0.028</b> |
|          |   | Dur  | 0.97    | 0.7    | 0.14   | 3.24    | 0.57   | 0.89    | 1.11    |                      |              |
|          |   | Post | 1.23    | 1.0    | 0.08   | 5.25    | 0.61   | 1.09    | 1.5     |                      |              |
|          | B | Pre  | 1.39    | 1.6    | 0.12   | 7.14    | 0.41   | 0.76    | 1.71    | (1.474,51.579)=0.039 | 0.922        |
|          |   | Dur  | 1.38    | 1.6    | 0.13   | 7.02    | 0.41   | 0.7     | 1.77    |                      |              |
|          |   | Post | 1.35    | 1.3    | 0.17   | 4.77    | 0.4    | 0.73    | 2.05    |                      |              |
|          | C | Pre  | 1.14    | 1.2    | 0.19   | 5.42    | 0.47   | 0.86    | 1.27    | (1.672,55.165)=0.043 | 0.936        |
|          |   | Dur  | 1.18    | 1.5    | 0.18   | 7.59    | 0.44   | 0.67    | 1.1     |                      |              |
|          |   | Post | 1.16    | 1.1    | 0.22   | 4.97    | 0.42   | 0.95    | 1.44    |                      |              |
|          | D | Pre  | 1.03    | 0.7    | 0.28   | 3.45    | 0.5    | 0.82    | 1.43    | (1.676,58.663)=0.242 | 0.746        |
|          |   | Dur  | 1.02    | 0.8    | 0.3    | 4.2     | 0.44   | 0.75    | 1.27    |                      |              |

|      |      |     |      |      |      |      |      |
|------|------|-----|------|------|------|------|------|
| Post | 1.09 | 0.8 | 0.24 | 2.99 | 0.52 | 0.79 | 1.42 |
|------|------|-----|------|------|------|------|------|

**Table S6: ANCOVA analysis of VLF ms<sup>2</sup> based on drinking history**

|                                 | <b>Alcoholism<br/>history</b> | <b>F</b> | <b>p-value<br/>time</b> | <b>F</b> | <b>p-value<br/>Time*group</b> |
|---------------------------------|-------------------------------|----------|-------------------------|----------|-------------------------------|
| <b>VLF (ms<sup>2</sup>)</b>     | Yes                           | 0.833    | 0.445                   | 2.828    | 0.027                         |
|                                 | No                            | 11.121   | <0.0001                 | 0.836    | 0.534                         |
| <b>Log VLF (ms<sup>2</sup>)</b> | Yes                           | 0.200    | 0.820                   | 1.438    | 0.233                         |
|                                 | No                            | 11.315   | <0.0001                 | 1.893    | 0.083                         |

### Supplementary File References

- [1] D. Raja, 'Deepak Raja's world of Hindustani Music: Raga Miya-ki Todi.... reluctant differentiation', *Deepak Raja's world of Hindustani Music*, Apr. 24, 2011. <http://swaratala.blogspot.com/2011/04/raga-miya-ki-todi-reluctant.html> (accessed Mar. 19, 2020).
- [2] 'Film Songs in Rag Mian Ki Todi'. [https://chandrakantha.com/raga\\_raag/film\\_song\\_raga/mian\\_ki\\_todi.shtml](https://chandrakantha.com/raga_raag/film_song_raga/mian_ki_todi.shtml) (accessed Mar. 19, 2020).
- [3] 'The Raga Guide - Malkauns', Jun. 20, 2009. <https://web.archive.org/web/20090620030217/http://www.wyastone.co.uk/nrl/world/raga/malkauns.html> (accessed Mar. 19, 2020).
- [4] 'Raag Puriya - Indian Classical Music - Tanarang.com'. [http://www.tanarang.com/english/puriya\\_eng.htm](http://www.tanarang.com/english/puriya_eng.htm) (accessed Mar. 19, 2020).
- [5] 'Puriya', *Wikipedia*. Nov. 20, 2019. Accessed: Mar. 19, 2020. [Online]. Available: <https://en.wikipedia.org/w/index.php?title=Puriya&oldid=927072231>
